# Supplementary material for: Calix[4]arene Polyamine Triazoles: Synthesis, Aggregation and DNA Binding
Source: MDPI journal article supplement (doi:10.3390/ijms232314889), 2022-11-28
Supplement: s1 [file s1]

## Supplementary Material

(a)

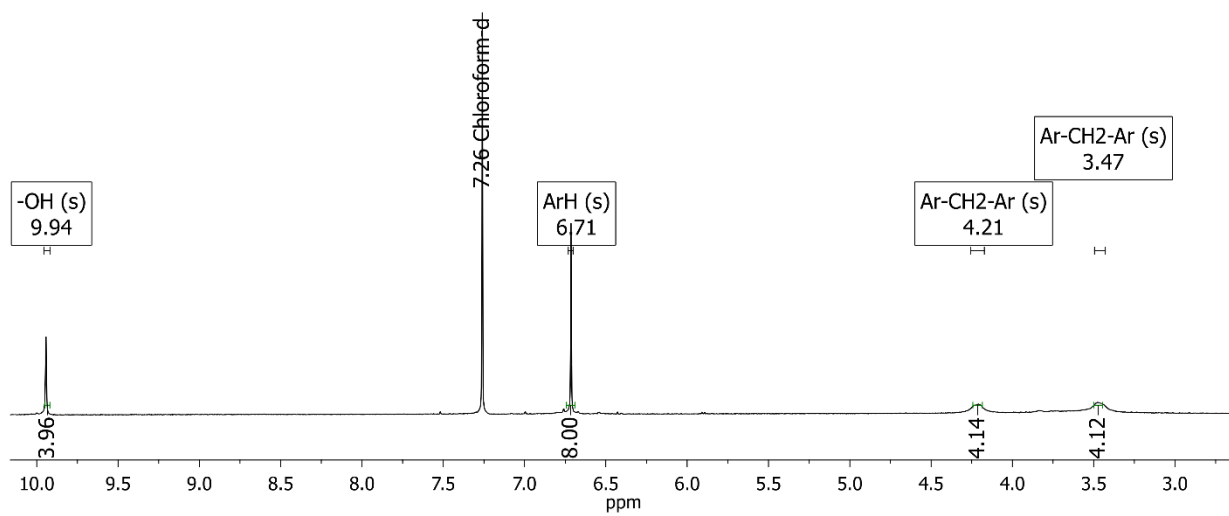

(b)

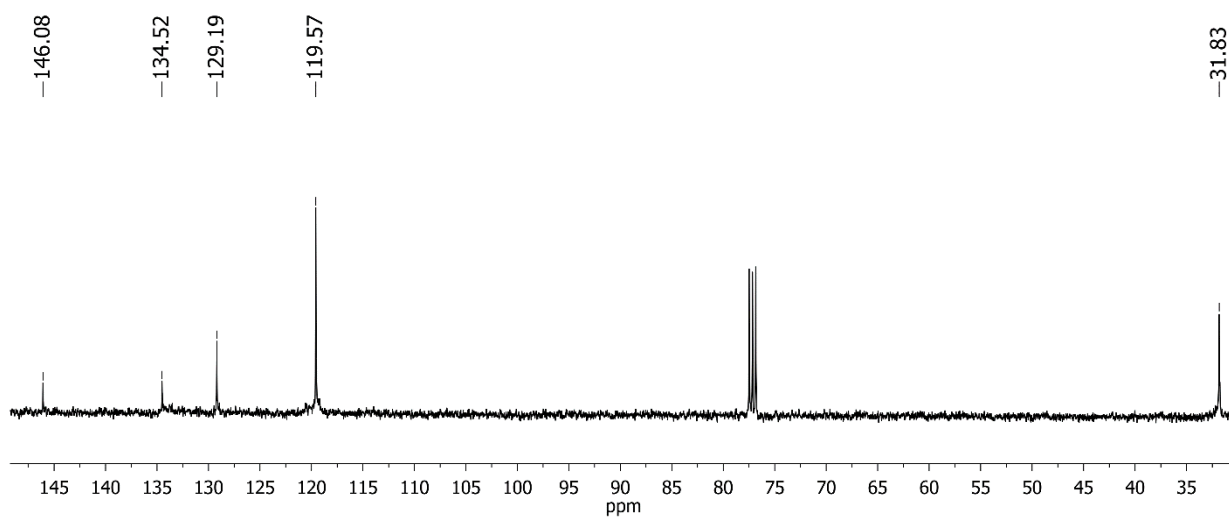

(c)

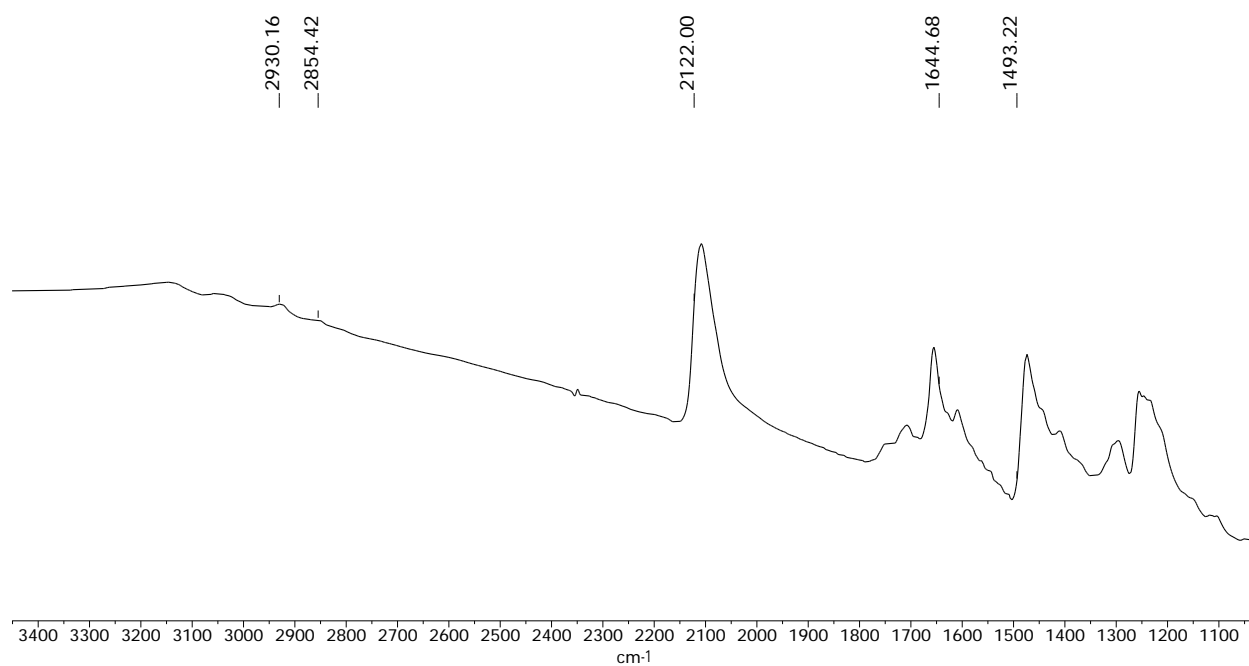

(d)

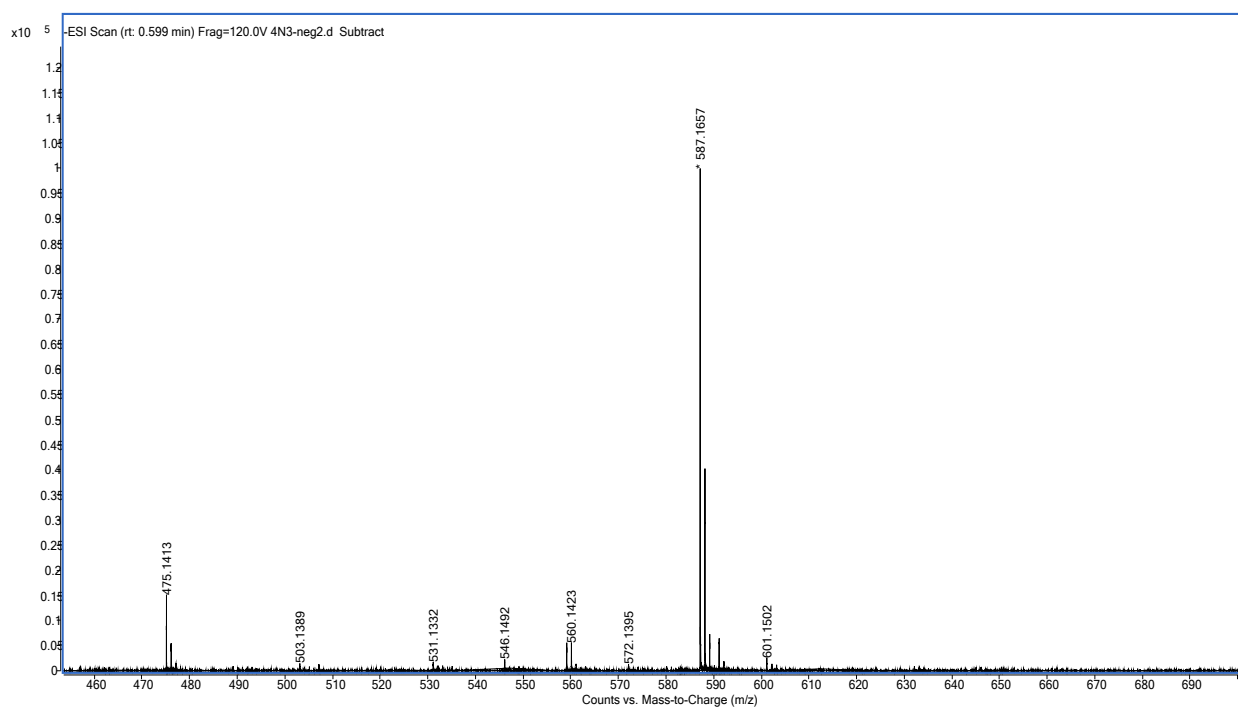

Figure S1. NMR <sup>1</sup>H (a), <sup>13</sup>C (b), FTIR (c) and HRESI MS (d) spectra of 5,11,17,23-tetraazide-25,26,27,28-tetrahydroxycalix[4]arene **3**.

(a)

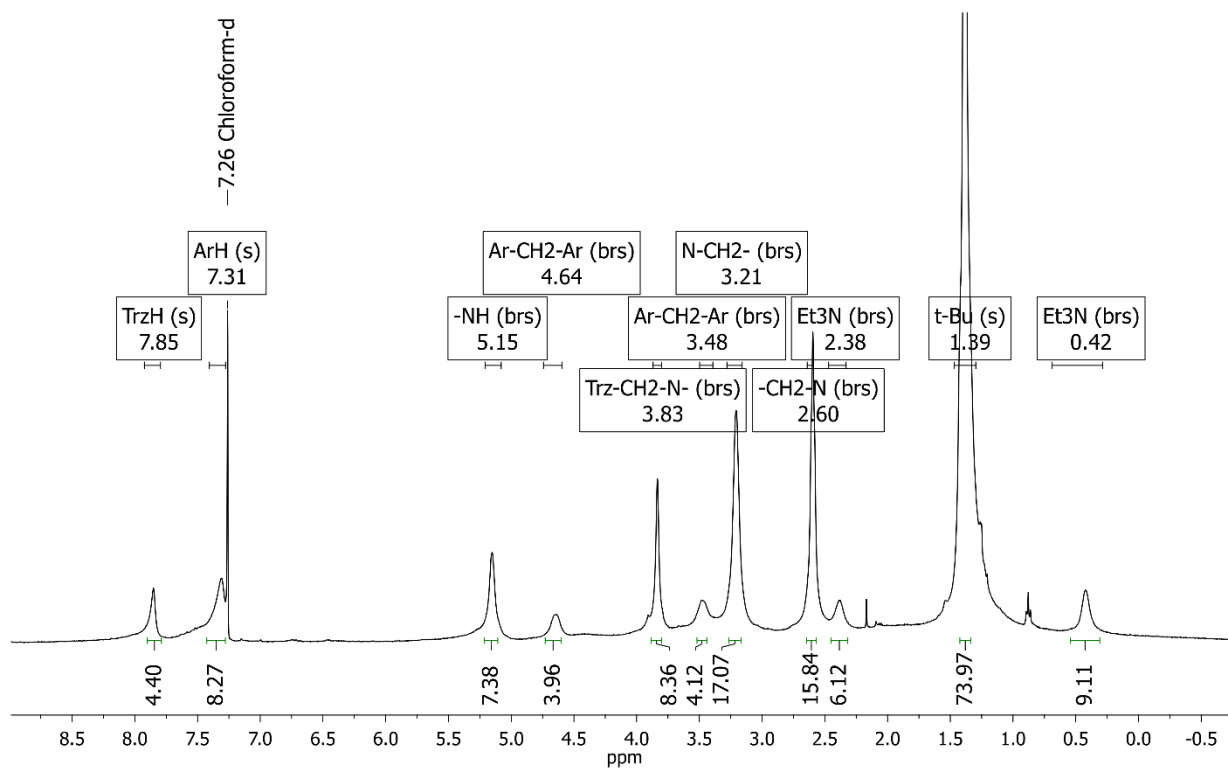

(b)

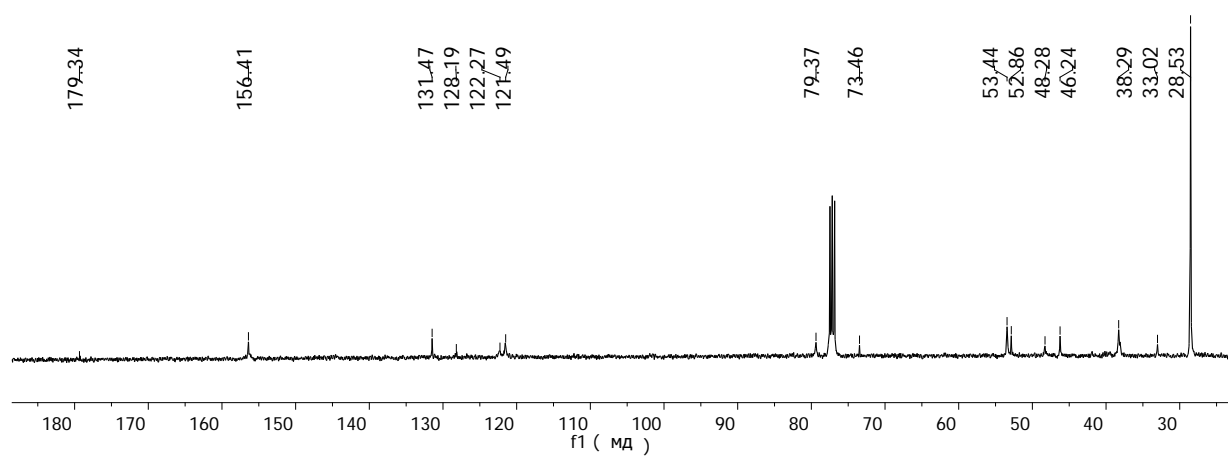

(c)

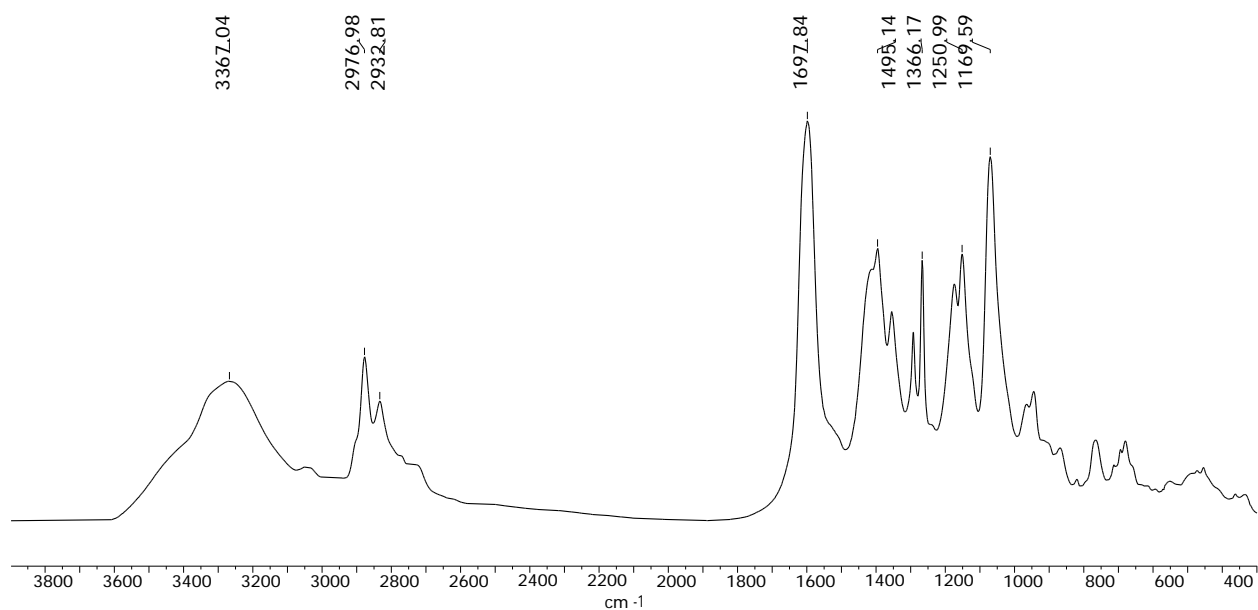

(d)

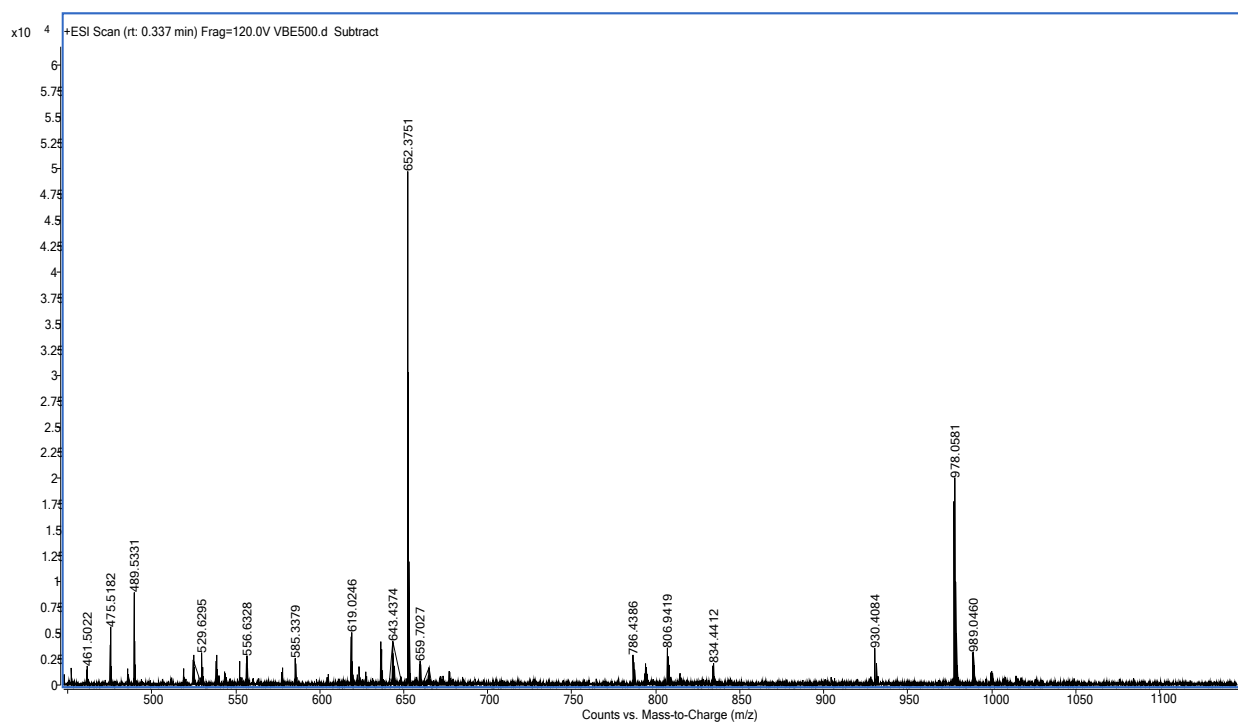

Figure S2. NMR <sup>1</sup>H (a), <sup>13</sup>C (b), FT IR (c) and HRESI MS (d) spectra of (5,11,17,23-tetra(4-((bis(2-((tert-butoxycarbonyl)amino)ethyl)amino)methyl)-1H1,2,3-triazol-1-yl))-25,26,27,28-tetrahydroxycalix[4]arene) **4**.

a)

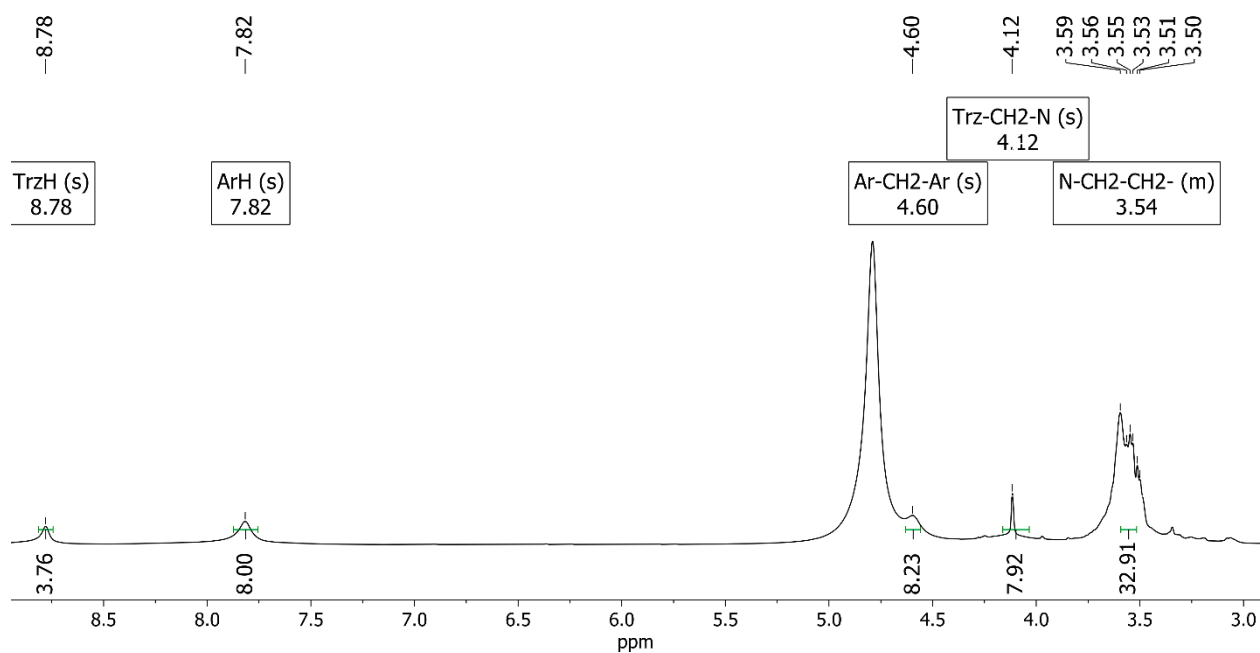

b)

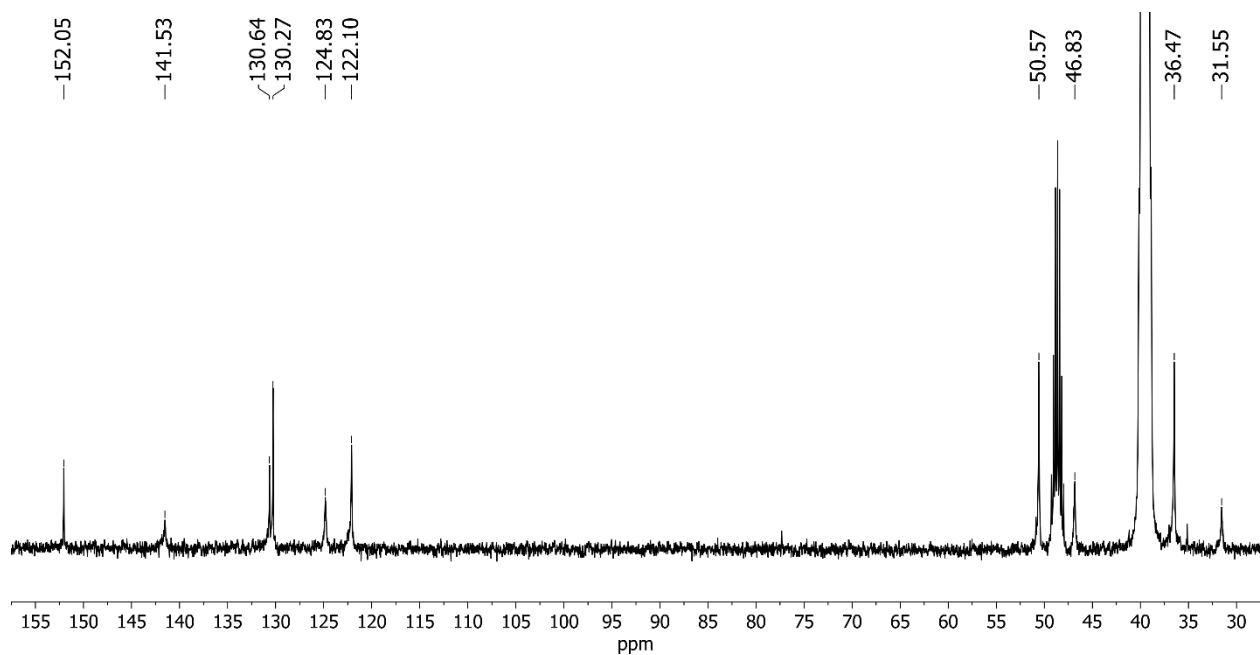

(c)

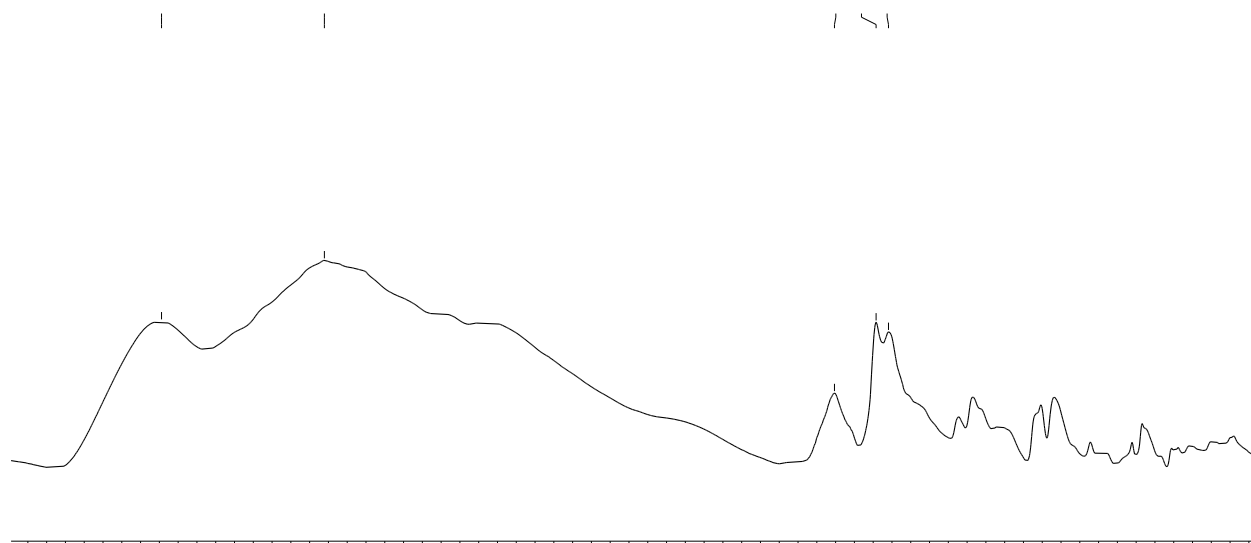

(d)

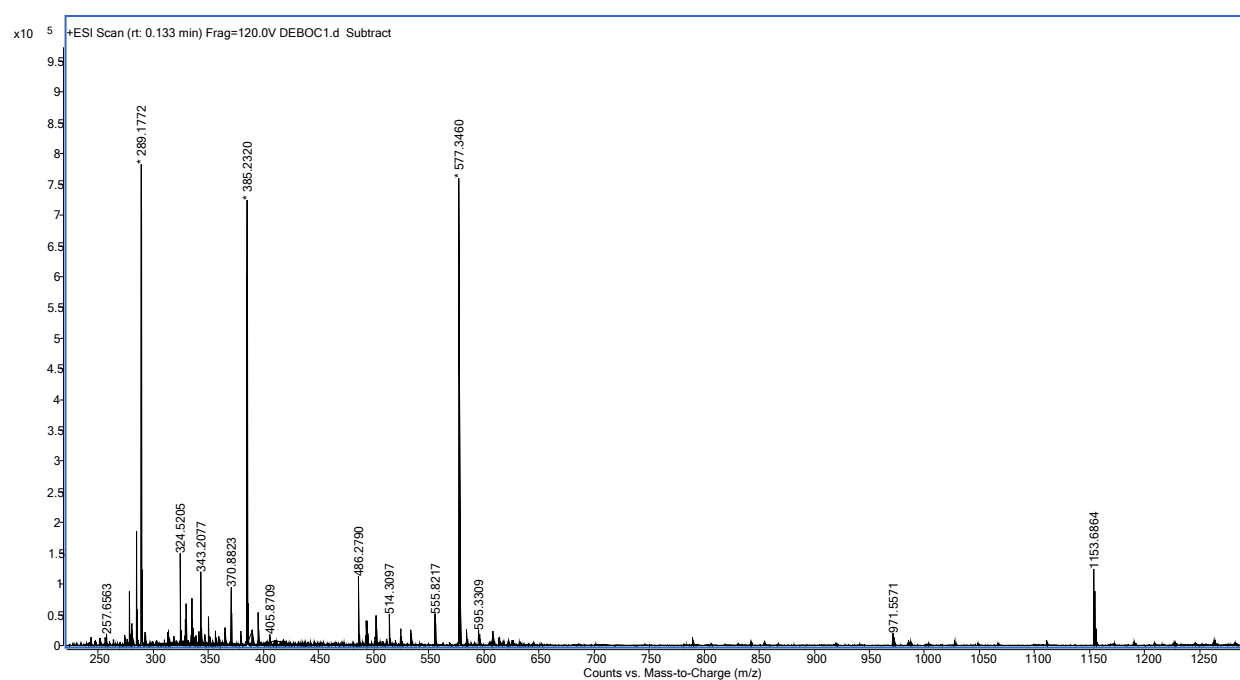

Figure S3. NMR  $^1\text{H}$  (a),  $^{13}\text{C}$  (b), FTIR (c) and ESI (d) spectra of (5,11,17,23-tetra(4-((bis(2-(amino)ethyl) amino)methyl)-1H-1,2,3-triazol-1-yl))- 25,26,27,28-tetrahydroxycalix[4]arene octahydrochloride)**5**.

(a)

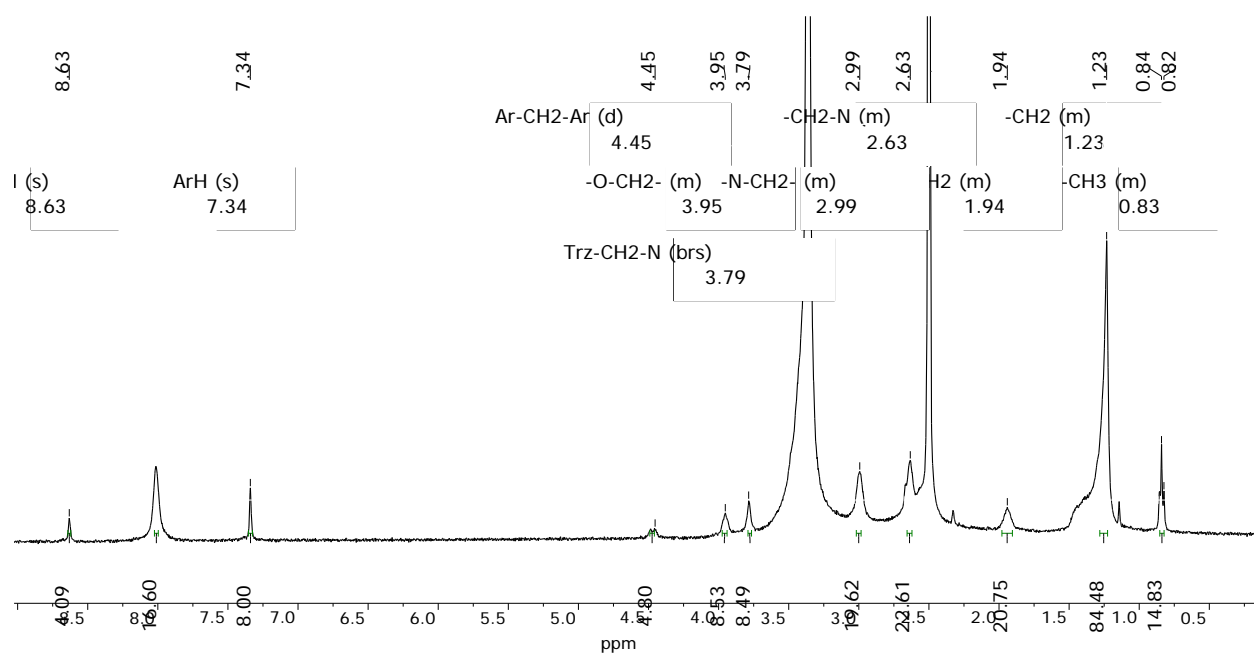

(b)

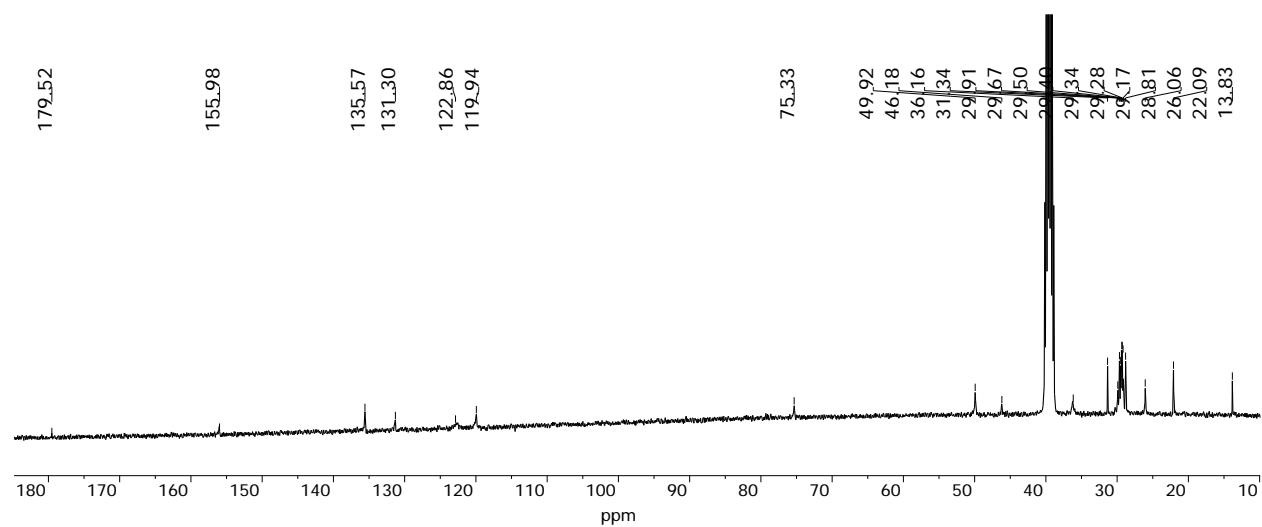

(c)

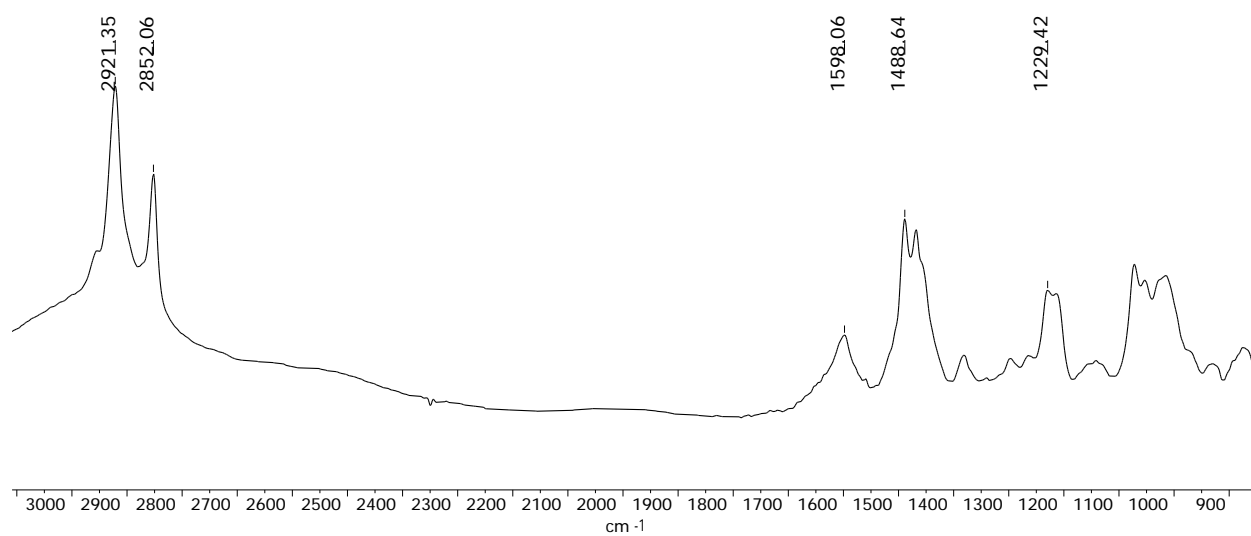

(d)

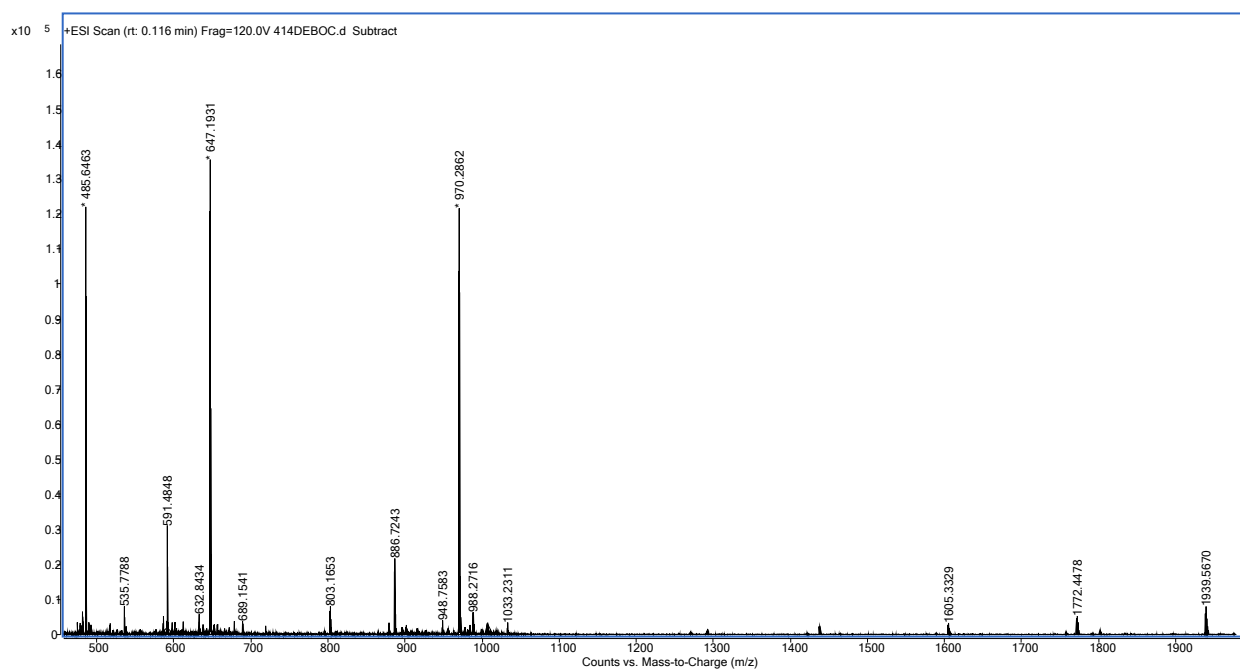

Figure S4. NMR <sup>1</sup>H (a), <sup>13</sup>C (b), FTIR (c) and ESI (d) spectra of (5,11,17,23-tetra(4-((bis(2-(amino)ethyl) amino)methyl)-1H-1,2,3-triazol-1-yl))- 25,26,27,28-tetratetradecylcalix[4]arene octahydrochloride) **7**.



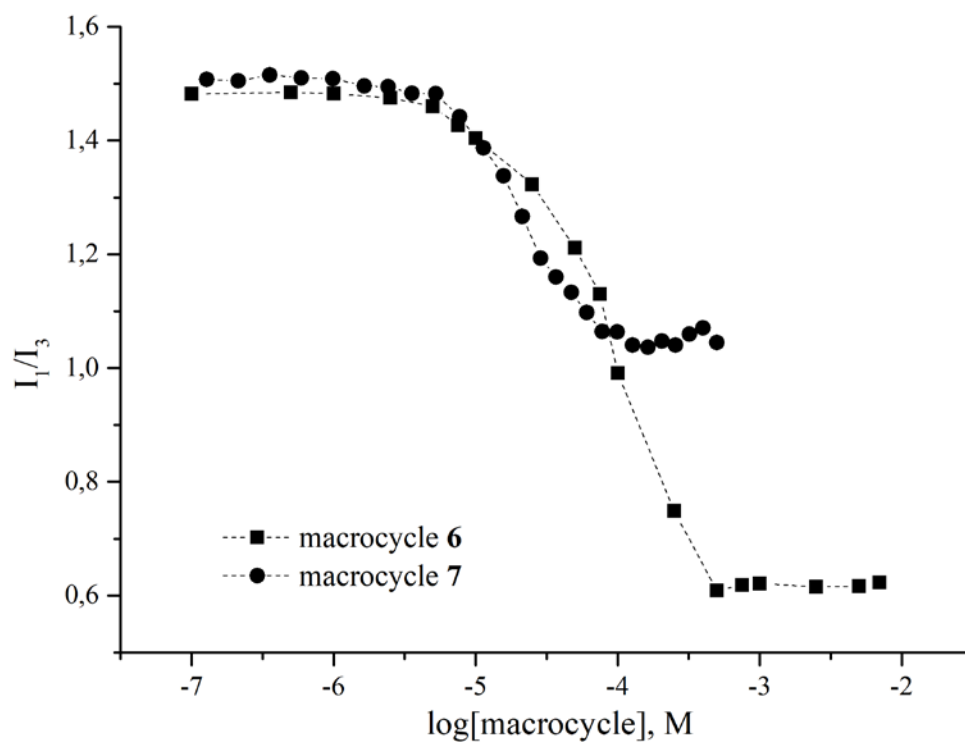

Figure S5. Dependence of the ratio of the first and third pyrene emission peaks on the logarithm of the concentration of macrocycles **6**, **7**.

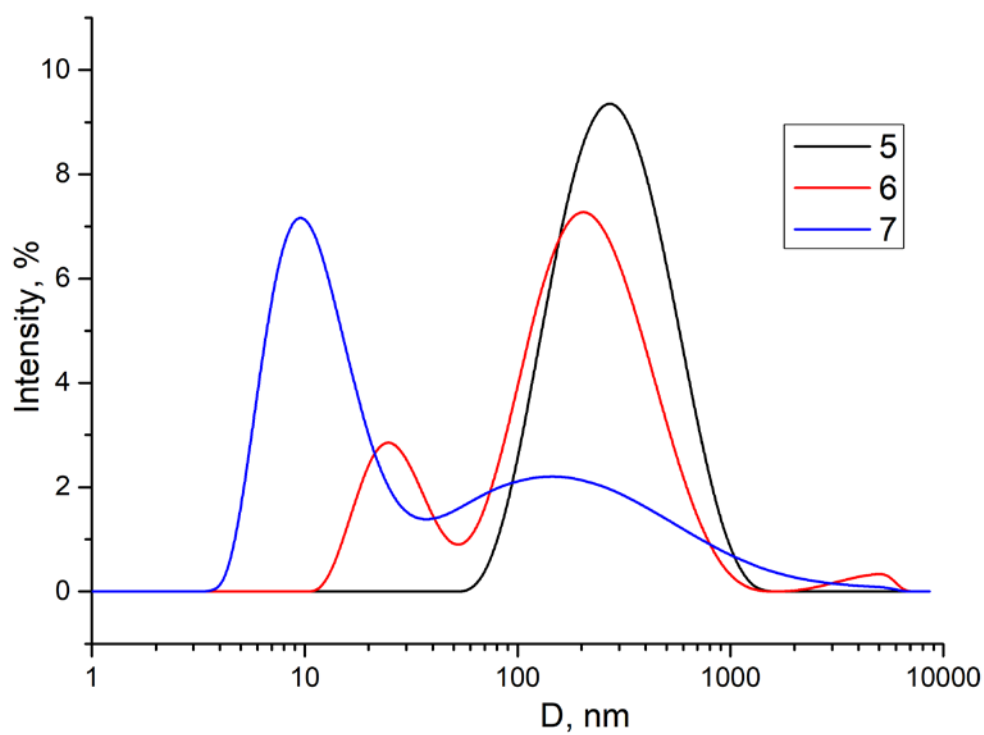

Figure S6. DLS intensity vs  $D$  graph for solutions of **5-7** ( $C = 0.05$  mM, 10 mM TRIS).

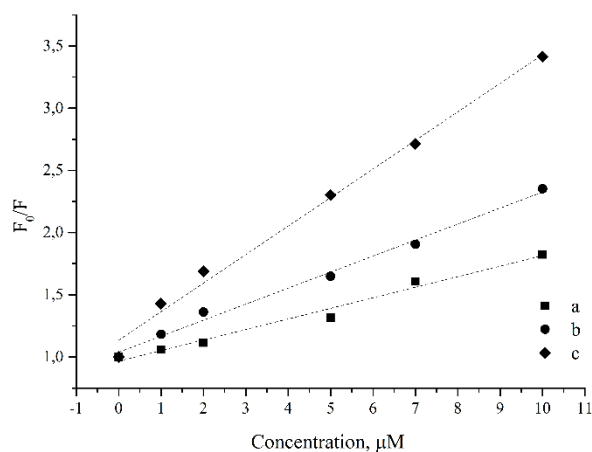

(A)

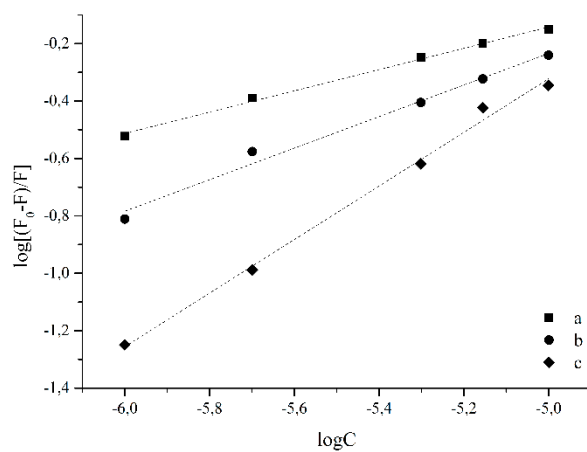

(B)

Figure S7. (A) Stern-Volmer plot of CT-DNA titrated with macrocycles **5-7**. (B) The plot of  $-\log[(F_0-F)/F]$  vs  $-\log[\text{macrocycle}]$ . a – **5**, b – **6**, c – **7**.

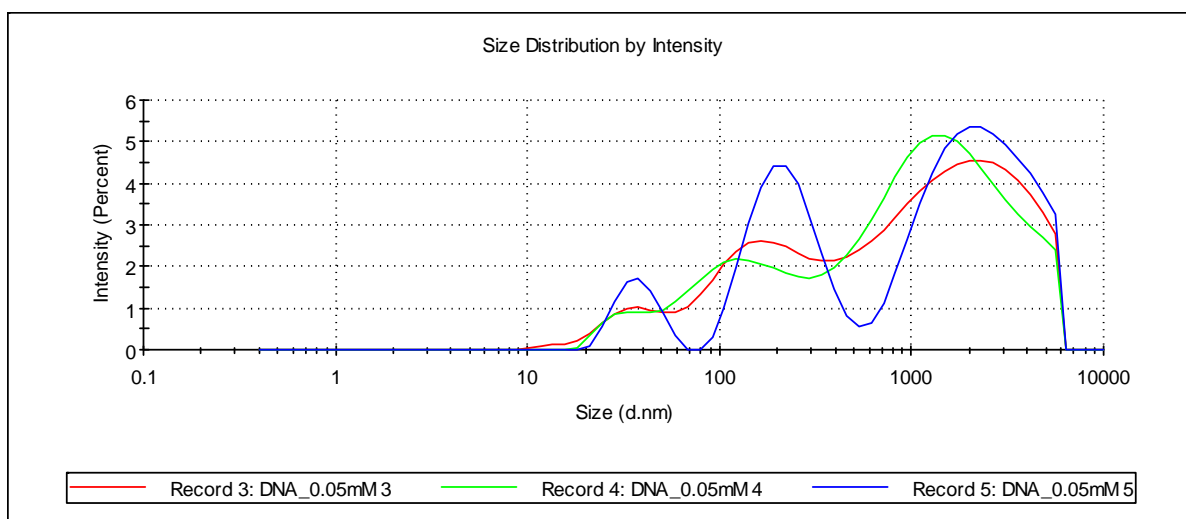

(A)

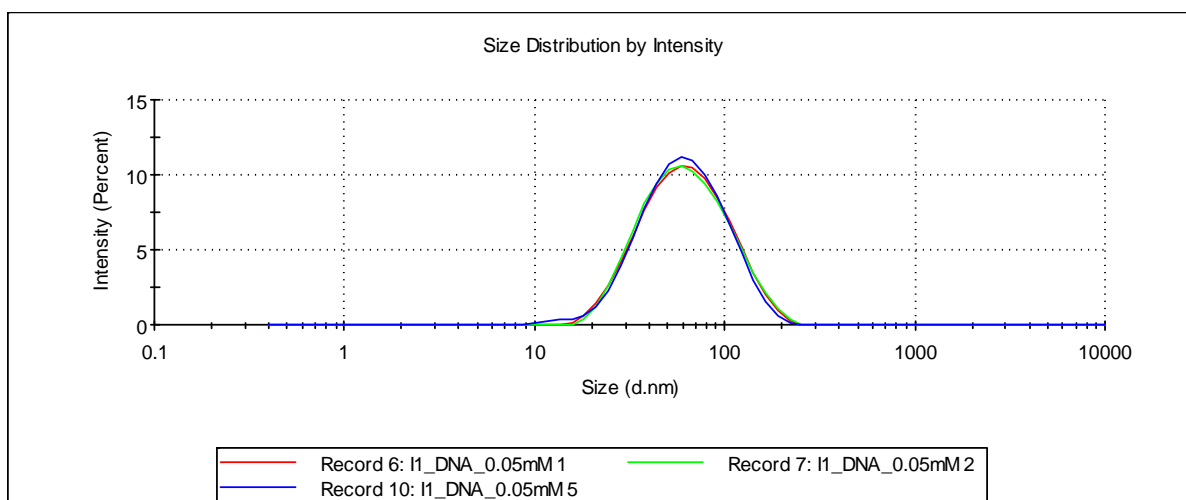

(B)

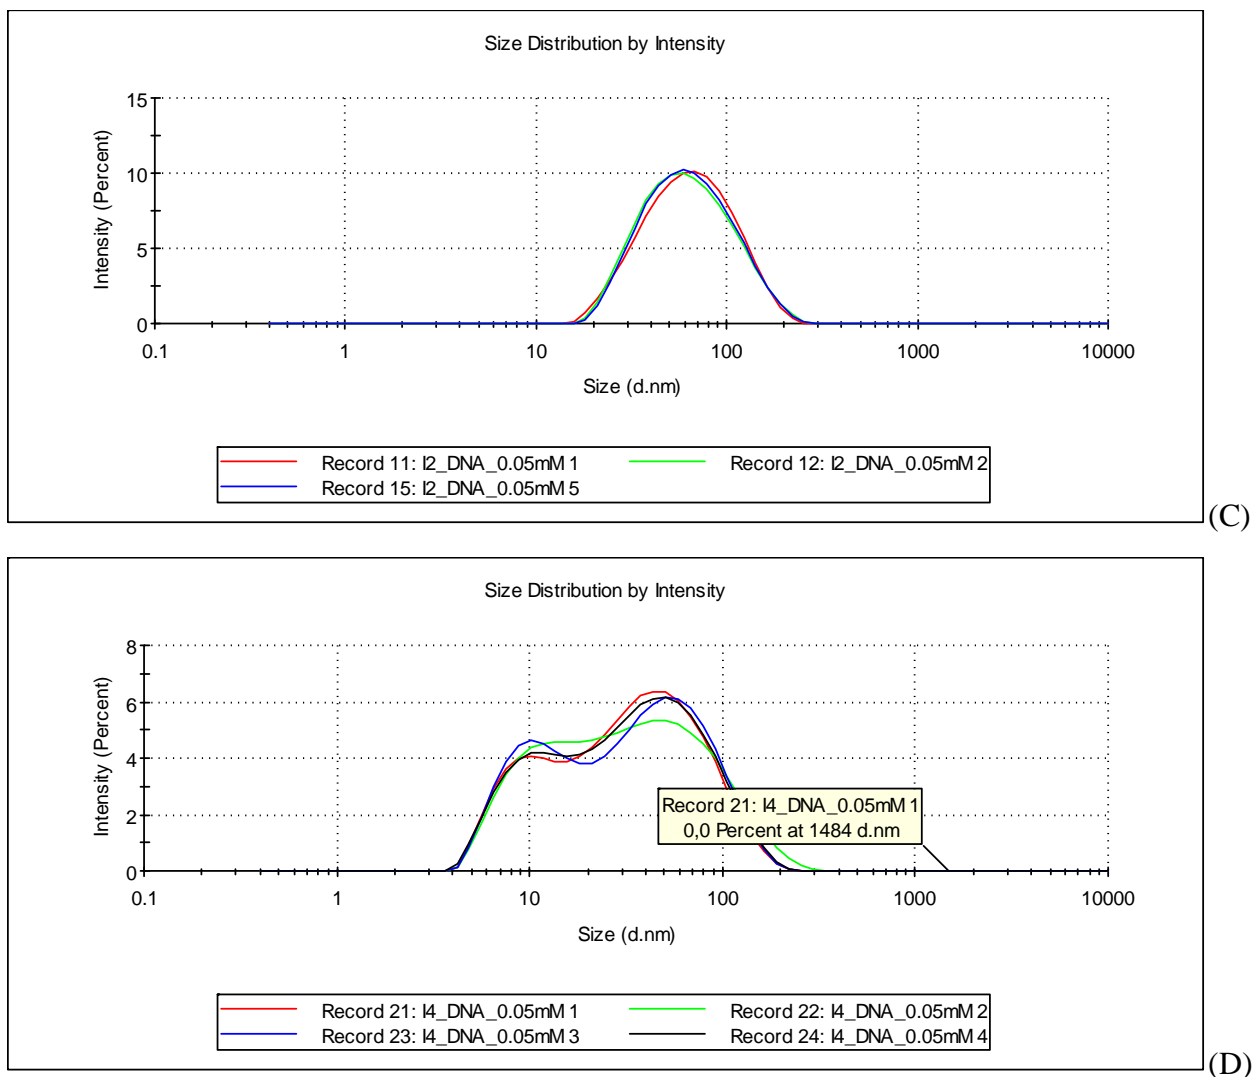

Figure S8. DLS intensity vs diameter graph for solutions of CT DNA (A) and CT-DA with **5** (B), **6**(C) or **7**(D) (C [CT DNA]= 0.05 mM, C [**5-7**] = 0.1 mM, 10 mM TRIS).
